# Supplementary material for: A Drug Stability Study Using Surface-Enhanced Raman Scattering on Silver Nanoparticles
Source: MDPI journal article supplement (doi:10.3390/app12041807), 2022-02-10
Supplement: s1 [file s1]

## **SUPPORTING MATERIAL**

### **A Drug Stability Study using Surface-Enhanced Raman Scattering on Silver Nanoparticles**

Hulya Yilmaz<sup>1,2\*</sup> and Mustafa Culha<sup>1,2,3\*</sup>

<sup>1</sup>Sabanci University Nanotechnology Research and Application Center (SUNUM), Tuzla, Istanbul 34956, Turkey

<sup>2</sup>Department of Genetics and Bioengineering, Faculty of Engineering, Yeditepe University, Atasehir, Istanbul 34755, Turkey

<sup>3</sup> Department of Internal Medicine, Morsani College of Medicine, The University of South Florida, Tampa, FL, 33620, United States

\*Correspondence: yilmazchulya@gmail.com, mculha2@gmail.com

## RESULTS

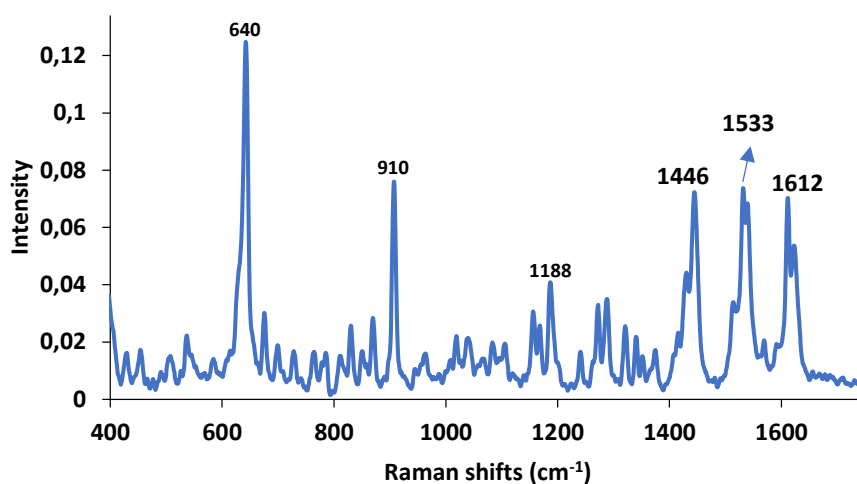

**Figure S1.** Raman spectrum of PMT

The assignment of each band was identified according to the previous studies [1-5].

**Table S1.** Tentative SERS band assignments

| Raman shifts (cm <sup>-1</sup> ) | Tentative assignments                          |
|----------------------------------|------------------------------------------------|
| 542-570                          | COC, OCC, OCO skeletal bending                 |
| 610-623                          | OH, out of plane bending (free)                |
| 640                              | HCH bending                                    |
| 678                              | CCC in phenyl ring                             |
| 750-780                          | Pyrimidine ring breathing                      |
| 819-829                          | CO stretching vibrations (major citrate bands) |
| 894-910                          | HCC, HCO bendings                              |
| 921                              | Benzene-ring breathing                         |
| 933-940                          | NCO                                            |
| 953                              | C=O stretching                                 |
| 1011-1026                        | Hydrogen bonds pyrimidine+water                |
| 1042-1055                        | CH in plane bending                            |
| 1081                             | CN stretching                                  |
| 1092-1102                        | COC stretching symmetric                       |
| 1188-1194                        | NH <sub>2</sub> stretching                     |
| 1218                             | CH <sub>2</sub> wagging                        |
| 1233                             | OH bending                                     |
| 1252-1274                        | NH <sub>2</sub> rocking                        |
| 1290-1301                        | CN stretching in benzotriazole + NH            |
| 1320-1323                        | HCH (wagging), HCC, HOC, COH (rocking) bending |
| 1356                             | CH <sub>2</sub> scissoring vibrations          |
| 1396                             | COO <sup>-</sup>                               |
| 1417                             | CH <sub>2</sub> scissoring                     |

|                  |                                                    |
|------------------|----------------------------------------------------|
| <b>1435-1450</b> | CH <sub>2</sub> symmetric deformation <sup>5</sup> |
| <b>1530-1541</b> | N-H deformation <sup>5</sup>                       |
| <b>1588</b>      | C-N stretching                                     |
| <b>1608-1615</b> | Phenyl <sup>5</sup>                                |

## REFERENCES

- 1) Yilmaz, H.; Cobandede, Z.; Yilmaz, D.; Cinkilic, A.; Culha, M.; Demiralay, E. C. Monitoring forced degradation of drugs using silica coated AgNPs with surface-enhanced Raman scattering. *Talanta* 214 (2020) 120828.
- 2) Alula, M.T.; Mengesha, Z.T.; Mwenesongole E. Advances in surface-enhanced Raman spectroscopy for analysis of pharmaceuticals: A review, *Vibrational Spectroscopy* 98 (2018) 50-63.
- 3) Oztas, D. Y.; Altunbek, M.; Uzunoğlu, D.; Yilmaz, H.; Çetin, D.; Suludere, Z.; Çulha, M. Tracing size and surface chemistry dependent endosomal uptake of gold nanoparticles using surface-enhanced Raman scattering. *Talanta* 214 (2020) 120828.
- 4) El-Zahry, M.R.; Lendl, B. Structure elucidation and degradation kinetic study of Ofloxacin using surface enhanced Raman spectroscopy, *Spectrochim. Acta Part A Mol. Biomol. Spectrosc.* 2018, 193, 63–70.
- 5) Elżbieta U. Stolarczyk, Krzysztof Stolarczyk, Marta Łaszcz, Marek Kubiszewski, Andrzej Leś, Olga Michalak, Pemetrexed conjugated with gold nanoparticles – Synthesis, characterization and a study of noncovalent interactions, *European Journal of Pharmaceutical Sciences*, 109 (2017) 13-20.
